# Supplementary material for: CoCr2O4 nanospheres for low temperature methane oxidation
Source: Royal Society of Chemistry journal article supplement (doi:10.1039/d0ce00698j), 2020-01-01
Supplement: d0ce00698j1.pdf [file d0ce00698j1.pdf]

## Supporting Information

### CoCr<sub>2</sub>O<sub>4</sub> Nanospheres for Low Temperature Methane Oxidation

Yiling Dai,<sup>a</sup> Haiyan Wang,<sup>b</sup> Shida Liu,<sup>b</sup> Kevin J. Smith,<sup>\*b</sup> Michael O. Wolf,<sup>\*a</sup> and Mark J. MacLachlan<sup>\*a</sup>

**Table S1.** Yields of CoCr<sub>2</sub>O<sub>4</sub> prepared with different solvothermal reaction times.

| Solvothermal reaction time for CoCr <sub>2</sub> O <sub>4</sub> | Yield after solvothermal reaction (g) | Yield after calcination (g) |
|-----------------------------------------------------------------|---------------------------------------|-----------------------------|
| 1 h                                                             | 0.6484                                | 0.4196                      |
| 3 h                                                             | 0.6856                                | 0.4224                      |
| 6 h                                                             | 0.7492                                | 0.4324                      |
| 8 h                                                             | 0.7500                                | 0.4466                      |
| 12 h                                                            | 0.7544                                | 0.4473                      |
| 24 h                                                            | 0.6819                                | 0.4360                      |

**Table S2.** Yields of CoCr<sub>2</sub>O<sub>4</sub> without adding benzyl alcohol.

| Solvothermal reaction time for CoCr <sub>2</sub> O <sub>4</sub> | Yield after solvothermal reaction (g) | Yield after calcination (g) |
|-----------------------------------------------------------------|---------------------------------------|-----------------------------|
| <b>Control-1h</b>                                               | 0.6171                                | 0.4152                      |
| <b>Control-8h</b>                                               | 0.6401                                | 0.4228                      |
| <b>Control-24h</b>                                              | 0.5952                                | 0.4067                      |

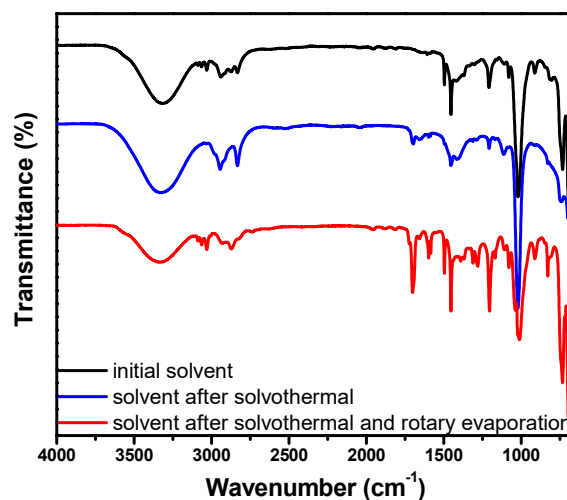

**Fig. S1.** FT-IR spectra for the solvent before and after solvothermal process.

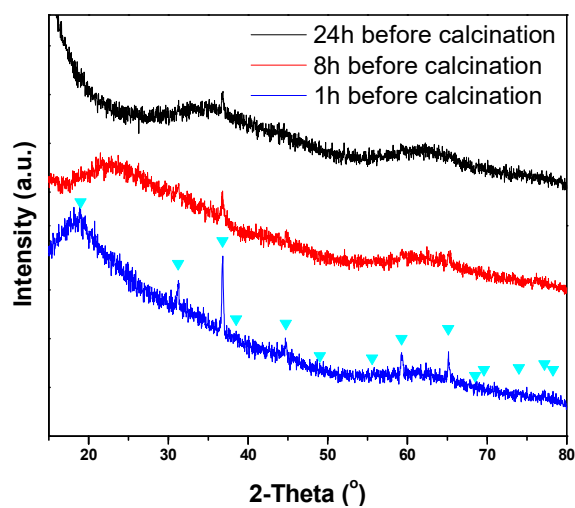

**Fig. S2.** PXRD patterns of  $\text{CoCr}_2\text{O}_4$  precursor with different times of solvothermal treatment. ( $\nabla$ ) Spinel, syn –  $\text{Co}_{2.74}\text{O}_4$  (JCPDS 78-5614).

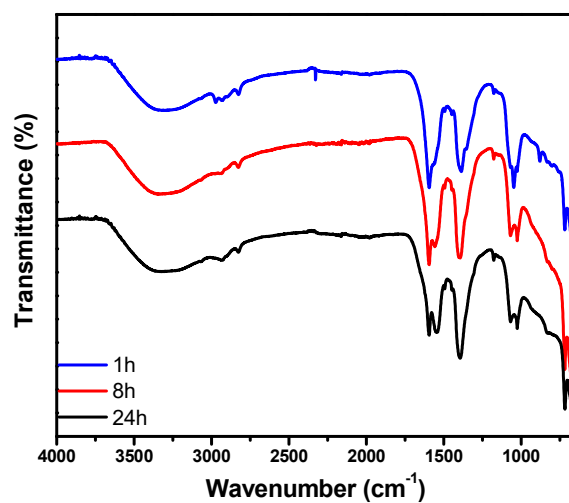

**Fig. S3.** FTIR spectra for  $\text{CoCr}_2\text{O}_4$  precursors prepared with different solvothermal reaction times.

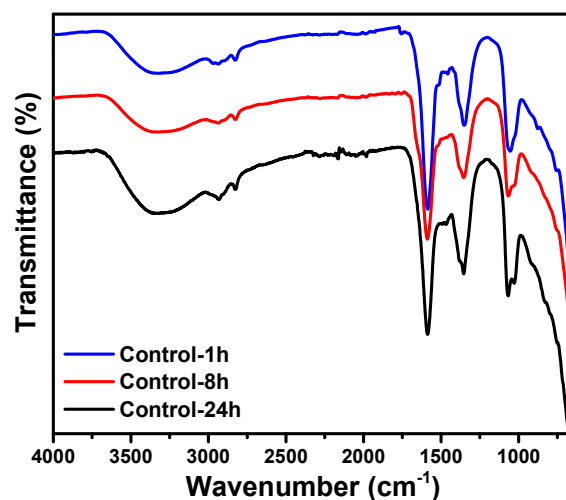

**Fig. S4.** FTIR spectra for  $\text{CoCr}_2\text{O}_4$  precursors prepared with different solvothermal reaction times without adding benzyl alcohol. Strong peaks at 1586 and 1355  $\text{cm}^{-1}$  are due to the asymmetric and symmetric C=O stretching of salts of carboxylic acids, respectively. Medium intensity bands at 2935 and 2823  $\text{cm}^{-1}$  are assigned to the antisymmetric and symmetric stretching of  $\text{CH}_3$ . A strong band at 1031  $\text{cm}^{-1}$  is due to C-O stretching.

**Table S3.** Weight percentage of different elements for  $\text{CoCr}_2\text{O}_4$  precursor.

| $\text{CoCr}_2\text{O}_4$ precursor | Co (wt %) | Cr (wt %) | C (wt %)                 | O (wt %) | H (wt %) |
|-------------------------------------|-----------|-----------|--------------------------|----------|----------|
| 1h                                  | 9.1       | 15.9      | 33.0 (11.2) <sup>a</sup> | 42.0     | (3.1)    |
| 8h                                  | 14.1      | 25.7      | 28.9 (11.9)              | 31.3     | (3.7)    |
| 24h                                 | 14.2      | 22.6      | 30.3 (12.8)              | 32.9     | (3.4)    |
| <b>Control-1h</b>                   | 21.5      | 40.0      | 16.4                     | 22.2     |          |
| <b>Control-8h</b>                   | 22.3      | 39.7      | 16.1                     | 22.0     |          |
| <b>Control-24h</b>                  | 22.5      | 41.5      | 16.0 (5.0)               | 21.0     | (3.7)    |

<sup>a</sup>Data in parentheses were determined by combustion elemental analysis. The difference in C analysis likely arises from the fact that XPS profiles a limited depth while combustion analysis gives a bulk analysis. The C analysis from combustion is most accurate for the bulk material; XPS is most useful for elemental ratios in the samples.

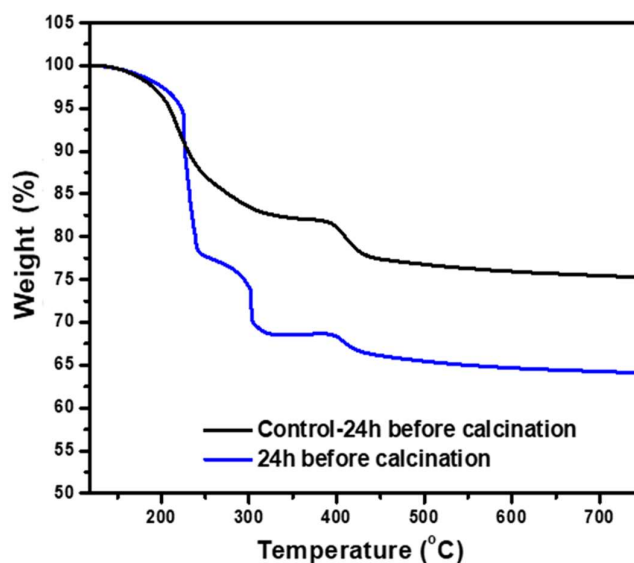

**Fig. S5.** TGA traces for the  $\text{CoCr}_2\text{O}_4$  precursors prepared with or without adding benzyl alcohol during the solvothermal reaction.

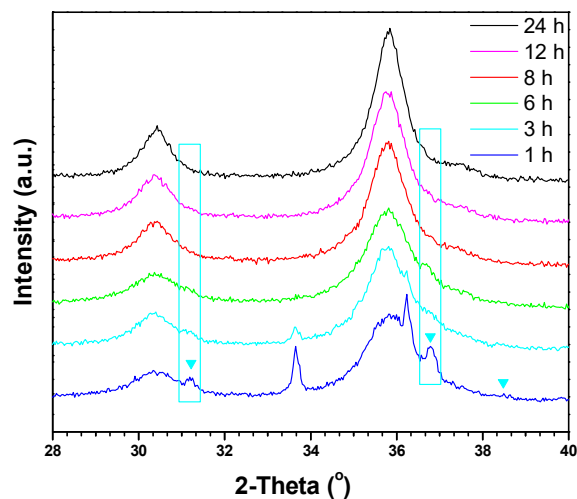

**Fig. S6.** PXRD patterns for  $\text{CoCr}_2\text{O}_4$  prepared with different solvothermal reaction times. ( $\blacktriangledown$ ) Spinel, syn –  $\text{Co}_{2.74}\text{O}_4$  (JCPDS 78-5614).

**Table S4.** Particle size calculated with the Scherrer equation for  $\text{CoCr}_2\text{O}_4$  catalysts.

| Sample | Particle size determined from (220) (nm) | Particle size determined from (311) (nm) |
|--------|------------------------------------------|------------------------------------------|
| 6 h    | 7.0                                      | 6.1                                      |
| 8 h    | 8.6                                      | 7.2                                      |
| 12 h   | 9.0                                      | 7.5                                      |
| 24 h   | 10.4                                     | 8.4                                      |

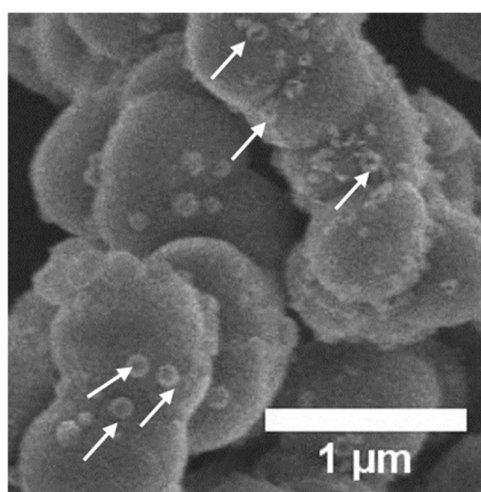

**Fig. S7.** SEM image for  $\text{CoCr}_2\text{O}_4$  prepared with 8 h solvothermal treatment. The white arrows point to the hollow structure or breakage of  $\text{Co}_3\text{O}_4$ .

**Table S5.** Comparison of catalytic performance of  $\text{CoCr}_2\text{O}_4$  for methane combustion with literature compositions.

| Catalysts                                                      | GHSV (mL/(g•h)) | T <sub>10%</sub> | T <sub>50%</sub> | T <sub>90%</sub> | reference |
|----------------------------------------------------------------|-----------------|------------------|------------------|------------------|-----------|
| $\text{CoCr}_2\text{O}_4$ (8 h)                                | 180,000         | 318              | 396              | 453              | This work |
| $\text{CoCr}_2\text{O}_4$                                      | 36,000          |                  | 392              | 464              | 1         |
| $\text{CoCr}_2\text{O}_4$                                      | 48,000          | 500              |                  | 750              | 2         |
| $\text{CoCr}_2\text{O}_4$                                      | 36,000          |                  | 420              | 514              | 3         |
| $\text{CoCr}_{1.95}\text{V}_{0.05}\text{O}_4$                  | 36,000          |                  | 388              | 438              | 3         |
| $\text{LaFeAl}_x\text{O}_y(\text{LF1A})$                       | 48,000          | 450              | 555              | 640              | 4         |
| $\text{LaCO}_3\text{OH}/\text{Co}_3\text{O}_4/\text{graphene}$ | 10,000          |                  | 315              | 420              | 5         |
| $\text{Co}_3\text{O}_4/\text{Al}_2\text{O}_3$ (CC)             | 60,000          | 335              | 430              | 505              | 6         |
| $\text{Ce}/\text{Co}_3\text{O}_4$                              | 60,000          | 340              | 425              | 495              | 6         |
| $\text{CoNi}(50:50)$                                           | 60,000          |                  |                  | 466              | 7         |
| 3DOM-m $\text{La}_{0.7}\text{Ce}_{0.3}\text{CoO}_3$            | 30,000          | 381              | 479              | 555              | 8         |

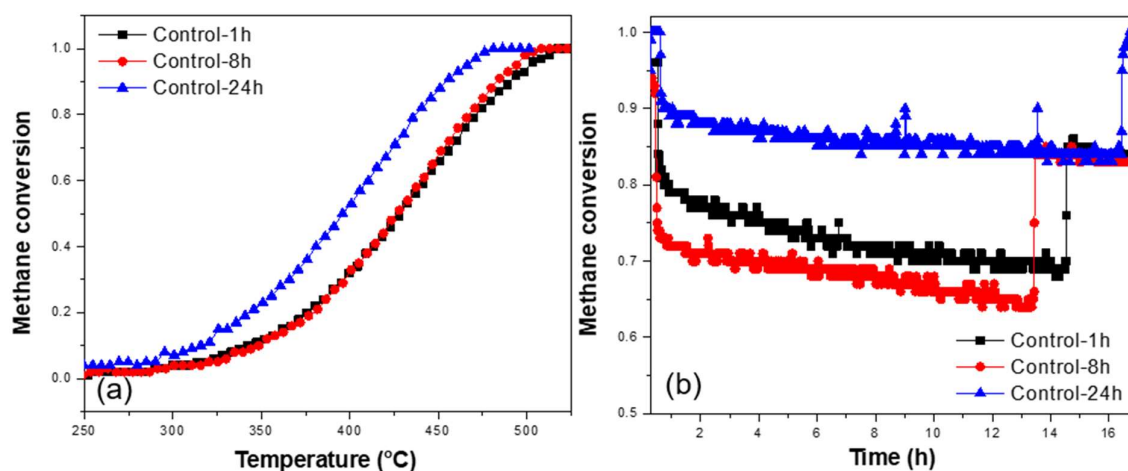**Fig. S8.** Catalytic performance in dry (a) and wet (b) conditions for control  $\text{CoCr}_2\text{O}_4$  samples prepared without benzyl alcohol.**Table S6.** Comparison of stability for the  $\text{CoCr}_2\text{O}_4$  catalysts prepared with and without adding benzyl alcohol.

| $\text{CoCr}_2\text{O}_4$ | Conversion drops at the beginning of $\text{H}_2\text{O}$ and $\text{SO}_2$ injection | Conversion in the presence of $\text{SO}_2$ and $\text{H}_2\text{O}$ within 13 h | Decreased conversion in total |
|---------------------------|---------------------------------------------------------------------------------------|----------------------------------------------------------------------------------|-------------------------------|
| 24 h                      | 98-80% ( $\Delta = 18\%$ )                                                            | 80-78% ( $\Delta = 2\%$ )                                                        | 20%                           |
| <b>Control-24h</b>        | 100-90% ( $\Delta = 10\%$ )                                                           | 90-84% ( $\Delta = 6\%$ )                                                        | 16%                           |
| 8 h                       | 100-92% ( $\Delta = 8\%$ )                                                            | 92-88% ( $\Delta = 4\%$ )                                                        | 12%                           |
| <b>Control-8h</b>         | 95-75% ( $\Delta = 20\%$ )                                                            | 75-66% ( $\Delta = 8\%$ )                                                        | 28%                           |
| 1 h                       | -                                                                                     | 99-85% ( $\Delta = 14\%$ )                                                       | 14%                           |
| <b>Control-1h</b>         | 96-82% ( $\Delta = 14\%$ )                                                            | 82-69% ( $\Delta = 13\%$ )                                                       | 28%                           |

**Table S7.** Comparison of stability for methane combustion with literature.

| Catalysts                                            | Conditions                                                                                             | Time (h)               | Stability in feed gas | Reversibility $\Delta T$ ( $^{\circ}\text{C}$ ) <sup>a</sup> | reference |
|------------------------------------------------------|--------------------------------------------------------------------------------------------------------|------------------------|-----------------------|--------------------------------------------------------------|-----------|
| CoCr <sub>2</sub> O <sub>4</sub> 8h                  | 10% H <sub>2</sub> O, 5 ppm SO <sub>2</sub> at 500 $^{\circ}\text{C}$                                  | 170                    | 100%-78%              | 30                                                           | This work |
| 0.33Pt-0.67Pd                                        | 3% H <sub>2</sub> O, 1000 ppm SO <sub>2</sub>                                                          | 670 $^{\circ}\text{C}$ | 100%-99%              | 60                                                           | 9         |
| /MnLaAl <sub>11</sub> O <sub>19</sub>                | 495 $^{\circ}\text{C}$                                                                                 | 5                      | 93%-93%               | -                                                            |           |
| Pd-CeNW@SiO <sub>2</sub>                             | 5% H <sub>2</sub> O, 20 ppm SO <sub>2</sub> at 450 $^{\circ}\text{C}$                                  | 10                     | 100%-100%             | -                                                            | 10        |
|                                                      | 5% H <sub>2</sub> O, at 375 $^{\circ}\text{C}$                                                         | 24                     | 100%-75%              | -                                                            |           |
| PdPt/Al <sub>2</sub> O <sub>3</sub>                  | 5% H <sub>2</sub> O, 10 ppm SO <sub>2</sub> at 500 $^{\circ}\text{C}$                                  | 4                      | 87%-10%               | -                                                            | 11        |
| Cr <sub>2</sub> O <sub>3</sub>                       | Emission from a coke oven, with NH <sub>3</sub> , N <sub>2</sub> , H <sub>2</sub> ,                    | 40                     | 100%-90%              | -                                                            | 12        |
| La <sub>0.9</sub> Ce <sub>0.1</sub> CoO <sub>3</sub> | H <sub>2</sub> O, CO, CO <sub>2</sub> , SO <sub>2</sub> and H <sub>2</sub> S at 450 $^{\circ}\text{C}$ | 35                     | 95%-75%               | -                                                            |           |
| 10Ce/Co <sub>3</sub> O <sub>4</sub>                  | 5% H <sub>2</sub> O, at 450 $^{\circ}\text{C}$                                                         | 150                    | 75%-40%               | 10                                                           | 6         |
| LaCoO <sub>3</sub>                                   | 100 ppm SO <sub>2</sub> at 600 $^{\circ}\text{C}$                                                      | 3                      | -                     | 60                                                           | 13        |

<sup>a</sup>  $\Delta T$  indicates the T<sub>50%</sub> shift between fresh and used catalysts measured under dry conditions.

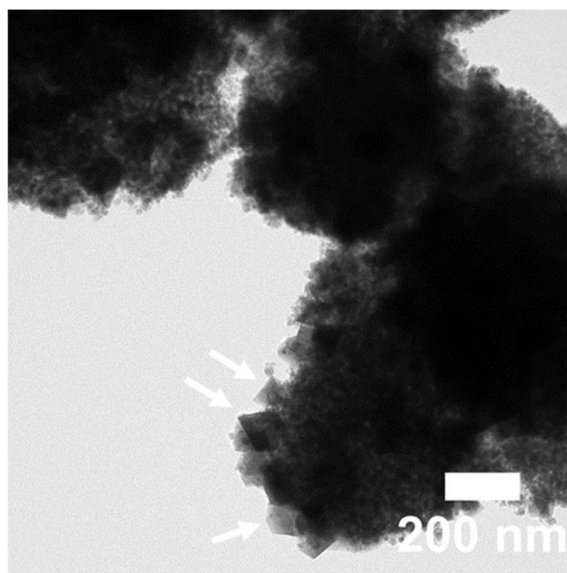**Fig. S9.** TEM image for CoCr<sub>2</sub>O<sub>4</sub> 8 h after durability test. The white arrows point to the sintered Co<sub>3</sub>O<sub>4</sub> particles.

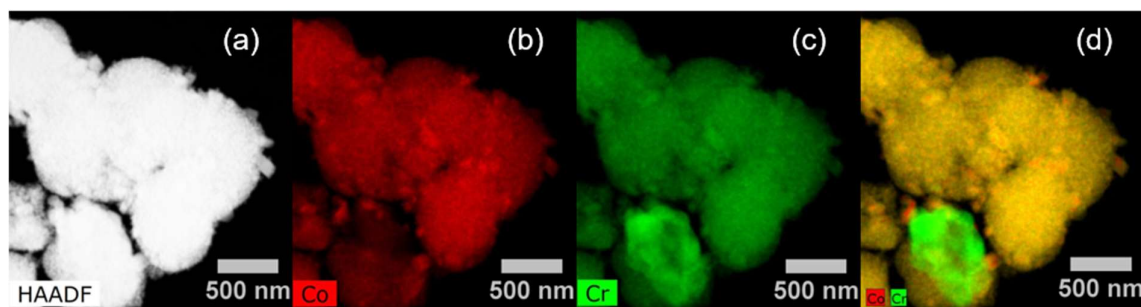

**Fig. S10.** EDX mapping for  $\text{CoCr}_2\text{O}_4$  8 h catalysts after durability test.

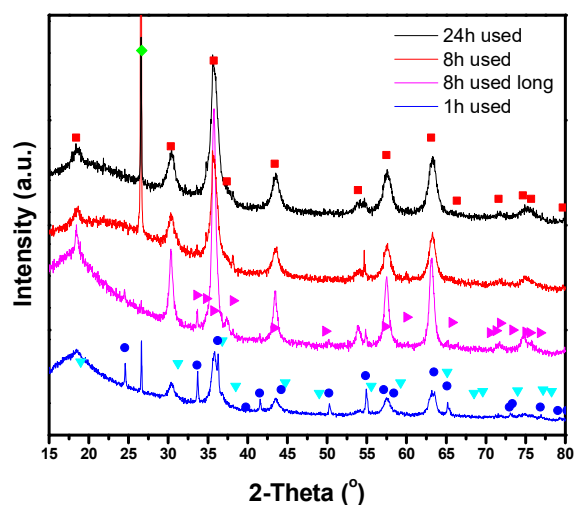

**Fig. S11.** PXRD patterns for used  $\text{CoCr}_2\text{O}_4$  catalysts. (■) Cobalt chromite, syn –  $\text{CoCr}_2\text{O}_4$  (JCPDS 22-1084). (▼) Spinel, syn –  $\text{Co}_{2.74}\text{O}_4$  (JCPDS 78-5614). (●) Eskolaite, syn –  $\text{Cr}_2\text{O}_3$  (JCPDS 38-1479). (◆) Quartz, syn –  $\text{SiO}_2$  (JCPDS 79-1910). (▶) Moissanite 4H –  $\text{SiC}$  (JCPDS 72-4532).

**Table S8.** Particle size calculated with the Scherrer equation for the fresh and used catalysts.

| Sample                   | Particle size from (220) (nm) | Particle size from (311) (nm) |
|--------------------------|-------------------------------|-------------------------------|
| 8h fresh                 | 8.6                           | 7.2                           |
| 8h used                  | 9.4                           | 8.6                           |
| 8h long used             | 14.7                          | 11.8                          |
| 24h fresh                | 10.4                          | 8.4                           |
| 24h used                 | 10.6                          | 8.7                           |
| <b>Control-24h</b> fresh | 7.2                           | 6.3                           |
| <b>Control-24h</b> used  | 7.5                           | 6.7                           |

**Table S9.** H<sub>2</sub>-TPR profile and TOF for catalysts.

| CoCr <sub>2</sub> O <sub>4</sub>                    | H <sub>2</sub> consumption T<250 °C (mmol/g (°C)) | TOF (s <sup>-1</sup> ) |
|-----------------------------------------------------|---------------------------------------------------|------------------------|
| CoCr <sub>2</sub> O <sub>4</sub> 8h                 | 0.39 (192) <sup>a</sup>                           | 0.0090                 |
| CoCr <sub>2</sub> O <sub>4</sub> Control-24h        | 0.42 (207)                                        | 0.0101                 |
| CoCr <sub>2</sub> O <sub>4</sub> NH <sub>4</sub> OH | 0.16 (180)                                        | 0.0077                 |
| CoCr <sub>2</sub> O <sub>4</sub> NaOH               | 0.12 (171)                                        | 0.0041                 |
| Co <sub>3</sub> O <sub>4</sub>                      | 0.62 (233)                                        | 0.0348                 |
| Cr <sub>2</sub> O <sub>3</sub>                      | 0.18 (212)                                        | 0.0010                 |

<sup>a</sup> Reduction temperature

### Determination of Activation Energy

Previous research indicated that in oxidizing conditions, methane combustion follows a 1<sup>st</sup> order reaction mechanism with respect to methane. In this work, oxygen is in excess, so the reaction has a pseudo first-order reaction mechanism with respect to CH<sub>4</sub>. So

$$r_{CH_4} = N_{CH_4} X \quad (1)$$

$$r_{CH_4} = k[CH_4] = \left( A \exp\left(-\frac{E_a}{RT}\right) \right) [CH_4] \quad (2)$$

$$\ln r_{CH_4} = -\frac{1000E_a}{RT} + \ln A + \ln[CH_4] \quad (3)$$

where  $r_{CH_4}$  is reaction rate (μmol/s),  $N_{CH_4}$  is methane flow rate (μmol/s), X is the conversion of methane, k is rate constant (s<sup>-1</sup>),  $E_a$  is activation energy (kJ/mol),  $[CH_4]$  is methane concentration (μmol) and A is pre-exponential factor.

The amount of methane is low, so  $[CH_4]$  can be assumed to be approximately constant.  $E_a$  was obtained by the slope of the linear plot of  $\ln r_{CH_4}$  versus  $1000/T$ .



**Additional Experimental Details****Chemicals**

Cobalt(II) nitrate hexahydrate (Sigma-Aldrich,  $\geq 98\%$ ), chromium(III) nitrate nonahydrate (Fisher Scientific,  $> 96\%$ ), cobalt(II) acetate tetrahydrate (Alfa Aesar,  $98\%$ ), chromium(III) acetate hydrate (Matheson Coleman & Bell Manufacturing Chemists, Inc.), sodium hydroxide (Sigma-Aldrich,  $\geq 97.0\%$ ), methanol (Sigma-Aldrich,  $\geq 99.8\%$ ), benzyl alcohol (Sigma-Aldrich,  $\geq 99\%$ ), ammonium hydroxide (Fisher Scientific,  $28.0$  to  $30.0$  w/w %) and other solvents were used without further purification.

**Preparation of  $\text{Co}_3\text{O}_4$  and  $\text{Cr}_2\text{O}_3$  nanocrystals.**

Cobalt(II) nitrate hexahydrate ( $\text{Co}(\text{NO}_3)_2 \cdot 6\text{H}_2\text{O}$ ,  $1.749$  g,  $6.000$  mmol) or chromium(III) nitrate nonahydrate ( $\text{Cr}(\text{NO}_3)_3 \cdot 9\text{H}_2\text{O}$ ,  $2.401$  g,  $6.000$  mmol) were dissolved in  $20$  mL methanol. Benzyl alcohol ( $3$  mL,  $29$  mmol) was added and the solution was stirred for  $1$  h. The mixture was then transferred to a  $45$  mL Teflon-lined stainless steel autoclave. The sealed reaction vessel was heated at  $180$  °C for  $8$  h. After the reaction cooled to ambient conditions, the autoclave contents were collected by suction filtration. The dark green product was washed with ethanol three times, then dried at  $100$  °C for  $2$  h and calcined at  $500$  °C for  $3$  h.

**Preparation of  $\text{CoCr}_2\text{O}_4$  by the co-precipitation method with NaOH**

Cobalt(II) acetate tetrahydrate ( $\text{Co}(\text{CH}_3\text{CO}_2)_2 \cdot 4\text{H}_2\text{O}$ ,  $0.8303$  g,  $3.333$  mmol) and chromium(III) acetate hydrate ( $\text{Cr}(\text{CH}_3\text{CO}_2)_3 \cdot \text{H}_2\text{O}$ ,  $4.022$  g,  $6.667$  mmol) were dissolved in  $40$  mL deionized water at  $70$  °C while stirring. A sodium hydroxide solution (prepared by dissolving  $1.067$  g NaOH in  $10$  mL  $\text{H}_2\text{O}$ ) was added to the metal salt solution dropwise and the mixture continued stirring for  $1$  h at  $70$  °C. Afterward, the precipitate was collected by filtration, washed with  $\text{H}_2\text{O}$  and dried in an oven at  $100$  °C for  $8$  h. Finally, the product was calcined at  $500$  °C for  $3$  h.

**Preparation of  $\text{CoCr}_2\text{O}_4$  by the co-precipitation method with  $\text{NH}_4\text{OH}$** 

Cobalt(II) nitrate hexahydrate ( $\text{Co}(\text{NO}_3)_2 \cdot 6\text{H}_2\text{O}$ ,  $0.7276$  g,  $2.500$  mmol) and chromium(III) nitrate nonahydrate ( $\text{Cr}(\text{NO}_3)_3 \cdot 9\text{H}_2\text{O}$ ,  $2.001$  g,  $5.000$  mmol) were dissolved in  $30$  mL deionized water.  $10$  wt %  $\text{NH}_4\text{OH}$  solution ( $10$  mL  $\text{NH}_4\text{OH}$  diluted with  $20$  mL  $\text{H}_2\text{O}$ ) was added to the above metal salt solution dropwise until the pH equaled to  $9$ , then the mixture was stirred for  $1$  h. The precipitate was obtained by filtration, washed with  $\text{H}_2\text{O}$  and dried in oven at  $100$  °C for  $8$  h. Finally, the product was calcined at  $500$  °C for  $3$  h.

**References**

1. J. Chen, X. Zhang, H. Arandiyán, Y. Peng, H. Chang and J. Li, *Catal. Today*, 2013, **201**, 12.
2. J. Hu, W. Zhao, R. Hu, G. Chang, C. Li and L. Wang, *Mater. Res. Bull.*, 2014, **57**, 268.
3. J. H. Chen, W. B. Shi, S. J. Yang, H. Arandiyán and J. H. Li, *J. Phys. Chem. C*, 2011, **115**, 17400.
4. F. Huang, X. D. Wang, A. Q. Wang, J. M. Xu and T. Zhang, *Catal. Sci. Technol.*, 2016, **6**, 4962.
5. J. Li, M. Li, P. Gui, L. Zheng, J. Liang and G. Xue, *Catal. Today*, 2019, **327**, 134.
6. A. Choya, B. de Rivas, J. R. González-Velasco, J. I. Gutiérrez-Ortiz and R. López-Fonseca, *Appl. Catal., B*, 2018, **237**, 844.
7. T. H. Lim, S. J. Cho, H. S. Yang, M. H. Engelhard and D. H. Kim, *Appl. Catal., A*, 2015, **505**, 62.
8. H. Arandiyán, J. Scott, Y. Wang, H. Dai, H. Sun and R. Amal, *ACS Appl. Mater. Interfaces*, 2016, **8**, 2457.
9. S. A. Yashnik, Y. A. Chesalov, A. V. Ishchenko, V. V. Kaichev and Z. R. Ismagilov, *Appl. Catal., B*, 2017, **204**, 89.
10. H. Peng, C. Rao, N. Zhang, X. Wang, W. Liu, W. Mao, L. Han, P. Zhang and S. Dai, *Angew. Chem. Int. Ed.*, 2018, **57**, 8953.
11. N. Sadokhina, G. Smedler, U. Nylén, M. Olofsson and L. Olsson, *Appl. Catal., B*, 2018, **236**, 384.
12. S. Ordóñez, J. R. Paredes and F. V. Díez, *Appl. Catal., A*, 2008, **341**, 174.
13. G. S. Guo, K. Lian, L. J. Wang, F. B. Gu, D. M. Han and Z. H. Wang, *RSC Adv.*, 2014, **4**, 58699.
